# Supplementary material for: Endophytic fungal association via gibberellins and indole acetic acid can improve plant growth under abiotic stress: an example of Paecilomyces formosus LHL10
Source: Springer Nature journal article supplement (doi:10.1186/1471-2180-12-3), 2012-01-12

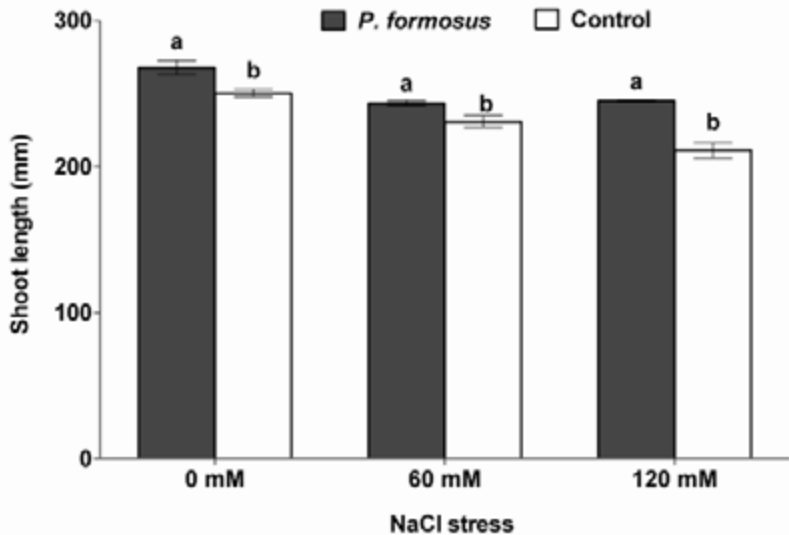

Supplement: 12866_2011_1566_MOESM5_ESM.pdf [file 12866_2011_1566_MOESM5_ESM.pdf]
